# Supplementary material
Source: publisher figshare collection journal article supplement (https://sage.figshare.com/ndownloader/files/24180382)
Supplement: Supplementary file 1 [file 24180382]

## Sheet: Hoja1
				predeictic eye-gaze				deictic events				Joint attention during deictic event
n	subject code	MLU-w	GALS	engagement				unimodal (V/P)		bimodal (P→V; V→P; P+V)		so	coord	dj
				shared object (so)	so average	coordinated (coord)	disjoint attention (dj)	Initiating	Responding	Initiating	Responding
1	Sub002	1.25	2	68	1.36	1	4	5	18	9	1	66	0	0
2	Sub003	1.33	1	30	1.06	0	13	3	6	12	4	19	0	6
3	Sub004	1.7	3	70	2.35	0	6	2	13	11	7	67	0	2
4	Sub006	3.31	4	39	3.38	0	4	1	5	23	5	36	2	0
5	Sub007	2.3	0.5	88	1.64	1	13	3	14	5	2	79	4	0
6	Sub008	1.46	2.5	49	2.42	2	8	1	23	0	4	38	0	8
7	Sub009	2.09	3	48	2.23	0	7	3	6	7	2	41	0	6
8	Sub010	2.06	3.5	37	2.21	6	1	0	20	0	2	28	7	1
tot		.	.	429	14.42	10	56					374	13	23
mean		1.96	2.43	95.3333	3.605	2.22222	12.4444					46.75	1.625	2.875
SD		0.67	1.2	19.849	0.779423	2.05287	4.27618					21.272	2.6152	3.27054
n	caregiver code	.	.	engagement				unimodal (V/P)		bimodal (P→V; V→P; P+V)		so	coord	dj
				so	so average	coord	dj	Initiating	Responding	Initiating	Responding
1	Tut002	.	.	same as children			2	4	0	29	9	same as children		0
2	Tut003	.	.				3	5	4	12	0			3
3	Tut004	.	.				0	12	3	28	0			0
4	Tut006	.	.				1	5	2	3	0			0
5	Tut007	.	.				1	11	2	60	6			0
6	Tut008	.	.				5	11	2	23	0			1
7	Tut009	.	.				2	5	1	33	0			1
8	Tut010	.	.				5	2	0	25	0			1
tot							19							6
mean							4.22222							0.75
SD							1.84681							1.0351
key tp the table
				predeictic eye-gaze [These data refer to the joint attentional behaviour conveyed by eye-gaze just prior to the realization of a deictic event. ]				deictic events [These data refer to the verbal and gestural categories used for the realization of a deictic event.]				Joint attention during deictic event [These data refer to the joint attentional behaviour conveyed by eye-gaze during the realization of a deictic event.]
n	subject code	MLU-w	GALS	engagement				unimodal (V/P)		bimodal (P→V; V→P; P+V)		so	coord	dj
				shared object (so)	so average	coordinated (coord)	disjoint attention (dj)	Initiating	Responding	Initiating	Responding
subject nymber	subect code (the upper part of the table represents the data for the children, while the bottom part displays the data related to caregivers)	Mean length of utterance (MLU), the mean of the total intelligible word produced divided by the number of statementsproduced by children. Nada data are presented for the caregivers.	GALS (Griglia d'Analisi del Linguaggio Spontaneo - Spontaneous language analysis form: calculated on the 0-6 level of morpho-syntactic complexity. No dara are presented for the caregivers.	Shared object condition is a predeictic behaviour where both partners look at the referent immediately prior to a deictic production.This condition is presented once, in the children's section, since it refers to a dyadic behaviour.	SO Average reports the mean of the time spent in the Shared Object condition.	Coordinated condition is a pre-deictic behaviour where the two partners are looking at each other just before the deictic occurrence. This condition is presented once, in the children's section, since it refers to a dyadic behaviour.	Disjoint condition is a pre-deictic behaviour where one partner, or both partners, shows to be disengaged by the joint attentional situation just prior to a deictic event. This condition is presented twice, in the children and caregivers' sections, since it refers to the single partners of the dyad.	These data refer to the unimodal verbal and pointing production alone. The Initiating subgroup refers to the occurrences starting the deictic interaction-	These data refer to the unimodal verbal and pointing production alone. The Responding subgroup refers to the occurrences responding to an initiating deictic interaction.	These data refer to the bimodal verbal and pointing productions ( V→P; P→V; V+P). The Initiating subgroup refers to the occurrences starting the deictic interaction.	These data refer to the bimodal verbal and pointing productions ( V→P; P→V; V+P). The Responding subgroup refers to the occurrences responding to an initiating deictic interaction.	Here we analyse Shared object behaviou as a condition during the realization of a deictic event.	Here we analyse Corrdinated bevahiour as a condition during the realization of a deictic event.	Here we analyse Disjoint behaviour as a condition during the realization of a deictic event.
